# Supplementary material
Source: PubMed Central journal article supplement (PMC3448863)
Supplement: NIHMS398934-supplement-Supp_Table_S1-S3.pdf [file NIHMS398934-supplement-Supp_Table_S1-S3.pdf]

**Table S1**

List of melanoma patient specimens used in this study and frequency of ALDH<sup>+</sup> subpopulations in the original and xenografted patient tumors

| <b>Patients</b> | <b>Gender</b> | <b>Age</b> | <b>Type</b> | <b>Origin</b> | <b>Percentage of ALDH<sup>+</sup> population in patient tumors</b> | <b>Percentage of ALDH<sup>+</sup> population in Xenografted tumors</b> |
|-----------------|---------------|------------|-------------|---------------|--------------------------------------------------------------------|------------------------------------------------------------------------|
| MF347           | Female        | 55         | Primary     | Skin          | 0.13%                                                              | 0.13%                                                                  |
| MF348           | Female        | 86         | Primary     | Skin          | ND                                                                 | 0.08%                                                                  |
| 111308          | Male          | 69         | Primary     | Skin          | 0.1%                                                               | 0.1%                                                                   |
| MB947p          | Female        | 65         | Primary     | Skin          | 0.2%                                                               | 0.1%                                                                   |
| MB947m          | Female        | 65         | Metastasis  | Lymph node    | 0.7%                                                               | 1.15%                                                                  |
| MB952           | Female        | 77         | Metastasis  | Lymph node    | shift                                                              | shift                                                                  |
| MB1009          | Male          | 63         | Metastasis  | Lymph node    | ND                                                                 | shift                                                                  |
| MB1047          | Female        | 28         | Metastasis  | Lymph node    | ND                                                                 | 0.55%                                                                  |
| MB1374          | Male          | 51         | Metastasis  | Lymph node    | 0.34%                                                              | ND                                                                     |
| 82909           | Male          | 56         | Metastasis  | Adrenal gland | 0.36%                                                              | 0.36%                                                                  |
| MB929           | Female        | 68         | Metastasis  | Skin          | 0.16%                                                              | 0.16%                                                                  |
| MB1375          | Male          | 42         | Metastasis  | Spleen        | 0.44%                                                              | ND                                                                     |

Nine tumors from melanoma patients and 10 xenografted tumors derived from direct *in vivo* xenograft were analyzed.  
ND: not determined.

**Table S2**

PCR primers used in qRT-PCR in this study

| <b>Gene</b>    | <b>Forward primer (5' to 3')</b> | <b>Reverse primer (5' to 3')</b> |
|----------------|----------------------------------|----------------------------------|
| <i>ADAR</i>    | GCTCTCCGTGTCTTGATTGGG            | GAGGAGGAGCATAGTTCTTCTGA          |
| <i>ALDH1A1</i> | ACTGCTCTCCACGTGGCATCTTTA         | TGCCAACCTCTGTTGATCCTGTGA         |
| <i>ALDH1A2</i> | AGGGCAGTTCTTGCAACCATGGAA         | CACACACTCCAATGGGTTTCATGTC        |
| <i>ALDH1A3</i> | ACCTGGAGGTCAAGTTCACCAAGA         | ACGTCGGGCTTATCTCCTTCTTCC         |
| <i>ALDH1B1</i> | TGCTGCAGAGTGTGAGCAT              | GGTGGTAGGGTTGACCGTCG             |
| <i>ALDH3A1</i> | TGTGTCAAAGGCGCCATGAGCAAG         | GGCGTTCCATTCACTTGTGCAG           |
| <i>ALDH3B1</i> | ACAAGTCAGCCTTCGAGTCGG            | AGCACCACACAGTTCCTGC              |
| <i>ALDH4A1</i> | TGCAGTACCAAGTGTGCGCTTT           | AATCTCCGCTTGGATCACGGTCTT         |
| <i>CDC42</i>   | CTTGCTTGTGGGACTCAAATTG           | GGCTCTTCTTCGGTTCGGAG             |
| <i>GAPDH</i>   | TGCACCACCAACTGCTTAGC             | GGCATGGACTGTGGTCATGAG            |
| <i>MLANA</i>   | GGCTGTTGGTATTGTAGAAGACG          | TTGAAGAGACACTTTGCTGTCC           |
| <i>TYRP1</i>   | TCTCTGGGCTGTATCTTCTTCC           | GTCTGGGCAACACATACCACT            |
| <i>USH1C</i>   | GCTCCTACGCATCAAGAAGG             | CCGCTCATACACAGCAGAAA             |

**Table S3**

List of predicted RARE elements between upstream (-10 kb) to downstream (+1 kb) of TSS

| <b>Genes</b>   | <b>Strand</b> | <b>RARE Sequence</b>  | <b>dTSS</b> | <b>Genes</b>   | <b>Strand</b> | <b>RARE Sequence</b>  | <b>dTSS</b> |
|----------------|---------------|-----------------------|-------------|----------------|---------------|-----------------------|-------------|
| <i>ACVR1B</i>  | (-)           | <u>AGGTCAGGAGTTCA</u> | -4503       | <i>ITPKA</i>   | (+)           | <u>AGGTCAGGAGTTCA</u> | -4080       |
| <i>ACHE</i>    | (+)           | <u>AGGTCAGGAGTTCA</u> | +183        | <i>ITPKA</i>   | (-)           | <u>AGGTCAGGAGTTCA</u> | -7798       |
| <i>ACHE</i>    | (+)           | <u>AGGTCAGGAGTTCA</u> | -286        | <i>KRT18</i>   | (-)           | <u>AGTTCAGAAGTTCA</u> | -78996      |
| <i>ACHE</i>    | (+)           | <u>AGGTCAGGAGTTCA</u> | -1511       | <i>LRRC48</i>  | (+)           | <u>AGGTCAGGAGTTCA</u> | -6566       |
| <i>ACHE</i>    | (+)           | <u>AGGTCAGGAGTTCA</u> | -3276       | <i>LRRC48</i>  | (-)           | <u>AGTTCAGGAGTTCA</u> | +821        |
| <i>AMT</i>     | (+)           | <u>AGGTCAGGAGTTCA</u> | -7513       | <i>PCDH11X</i> | (+)           | <u>GGGTCAGGGGTCA</u>  | +670        |
| <i>APOL1</i>   | (+)           | <u>AGTTCAGAGGTCA</u>  | -9599       | <i>PIAS2</i>   | (+)           | <u>AGGTCAGGAGTTCA</u> | -4152       |
| <i>CDC42</i>   | (-)           | <u>AGGTCAGGAGTTCA</u> | -2719       | <i>PIGH</i>    | (-)           | <u>GGGTCAGGAGTTCA</u> | -1405       |
| <i>CDC42</i>   | (-)           | <u>AGGTCAGGAGTTCA</u> | -8170       | <i>PPP1R3C</i> | (-)           | <u>AGGTCAGCAGTTCA</u> | -4284       |
| <i>CDC42</i>   | (-)           | <u>AGGTCAGGAGTTCA</u> | -8483       | <i>PRKCZ</i>   | (+)           | <u>AGGTCAGCAGTTCA</u> | -3923       |
| <i>CDYL</i>    | (+)           | <u>AGGTCAGGAGTTCA</u> | -7797       | <i>PTGS2</i>   | (+)           | <u>AGGTCAAGAGTTCA</u> | -803        |
| <i>CNTFR</i>   | (+)           | <u>GGGTCAAGGGTCA</u>  | -7811       | <i>RAB15</i>   | (-)           | <u>AGGTCATGAGGTCA</u> | -5372       |
| <i>CPNE6</i>   | (-)           | <u>AGGTCAGAGTTCA</u>  | -9694       | <i>RAD17</i>   | (-)           | <u>AGGTCAGGAGTTCA</u> | -8867       |
| <i>DONSON</i>  | (-)           | <u>AGGTCAGAAGTTCA</u> | -7715       | <i>REG1A</i>   | (+)           | <u>GGGTCAGGGGTCA</u>  | +451        |
| <i>DPP3</i>    | (-)           | <u>AGGTCAGGAGTTCA</u> | -8303       | <i>RNASE1</i>  | (-)           | <u>AGGTCAGGAGTTCA</u> | -9000       |
| <i>EPB41</i>   | (+)           | <u>AGGTCAGGAGTTCA</u> | -3372       | <i>RTEL1</i>   | (+)           | <u>AGGTCAGGAGTTCA</u> | -8112       |
| <i>FAM128B</i> | (+)           | <u>AGGTCAGGAGTTCA</u> | -3273       | <i>RTEL1</i>   | (+)           | <u>AGGTCAGGAGTTCA</u> | -7440       |
| <i>FAM128B</i> | (-)           | <u>AGGTCAGGAGTTCA</u> | -2706       | <i>RTEL1</i>   | (-)           | <u>AGGTCAGGAGTTCA</u> | -7750       |
| <i>FERMT3</i>  | (+)           | <u>AGGTCAGGAGTTCA</u> | -1269       | <i>SCARF1</i>  | (+)           | <u>AGGTCAGGAGTTCA</u> | -2277       |
| <i>FERMT3</i>  | (-)           | <u>AGTTCAGGAGTTCA</u> | -8136       | <i>SETD7</i>   | (+)           | <u>AGGTCAGGAGTTCA</u> | +989        |
| <i>GAGE5</i>   | (-)           | <u>AGGTCAGGAGTTCA</u> | -1832       | <i>SETD7</i>   | (-)           | <u>AGGTCAGGAGTTCA</u> | -4853       |
| <i>GFAP</i>    | (+)           | <u>AGGTCAGAGGTCA</u>  | -8455       | <i>SLC2A11</i> | (+)           | <u>AGGTCAGTAGTTCA</u> | +124        |
| <i>GGA1</i>    | (-)           | <u>AGGTCAGGAGTTCA</u> | -4690       | <i>SPSB4</i>   | (+)           | <u>AGGTCAGGAGTTCA</u> | -4284       |
| <i>GGA1</i>    | (-)           | <u>AGGTCAGGAGTTCA</u> | -8078       | <i>TAGAP</i>   | (+)           | <u>AGGTCAGGAGTTCA</u> | -2485       |
| <i>GLUL</i>    | (+)           | <u>AGGTCAGGAGTTCA</u> | -5706       | <i>THRSP</i>   | (+)           | <u>AGTTCAGGAGTTCA</u> | -1843       |
| <i>GLUL</i>    | (+)           | <u>AGTTCATGGGTTCA</u> | -6245       | <i>TMEM174</i> | (-)           | <u>AGGTCAGGAGTTCA</u> | -9283       |
| <i>GNB5</i>    | (-)           | <u>AGGTCAGGAGTTCA</u> | -6749       | <i>TLL3</i>    | (+)           | <u>AGGTCAGGAGTTCA</u> | -4129       |
| <i>GPR37L1</i> | (-)           | <u>AGGTCAGGAGTTCA</u> | -4279       | <i>UBTD2</i>   | (+)           | <u>AGGTCAGGAGTTCA</u> | -7173       |
| <i>GPR37L1</i> | (-)           | <u>AGGTCAGGAGTTCA</u> | -7949       | <i>UBTD2</i>   | (+)           | <u>AGTTCAGGGTTCA</u>  | +650        |
| <i>GPR37L1</i> | (-)           | <u>AGGTCAGGAGTTCA</u> | -2044       | <i>UBTD2</i>   | (-)           | <u>AGGTCAGGAGTTCA</u> | -5007       |
| <i>HIF3A</i>   | (-)           | <u>AGGTCAGGAGTTCA</u> | -3169       | <i>UBXD5</i>   | (+)           | <u>AGGTCAGGAGTTCA</u> | -4263       |
| <i>HIF3A</i>   | (+)           | <u>AGTTCAGGTTCA</u>   | -6674       | <i>ZNF75A</i>  | (+)           | <u>AGGTCAGGAGTTCA</u> | -603        |
| <i>IL28RA</i>  | (+)           | <u>AGGTCAGGAGTTCA</u> | -1444       |                |               |                       |             |
| <i>IL28RA</i>  | (+)           | <u>AGGTCAGGAGTTCA</u> | -7344       |                |               |                       |             |
| <i>IL28RA</i>  | (-)           | <u>AGGTCAGAAGTTCA</u> | -5041       |                |               |                       |             |
