# Supplementary material
Source: PubMed Central journal article supplement (PMC3448863)

Figure S1

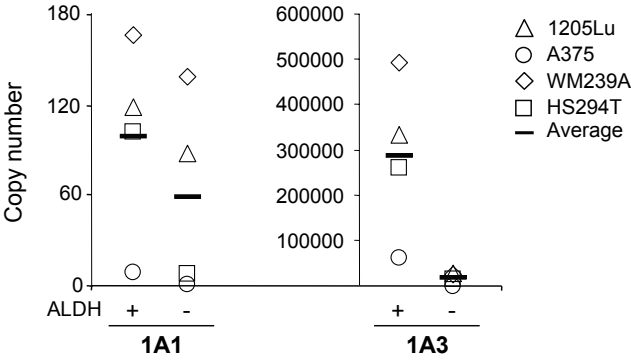

Figure S2

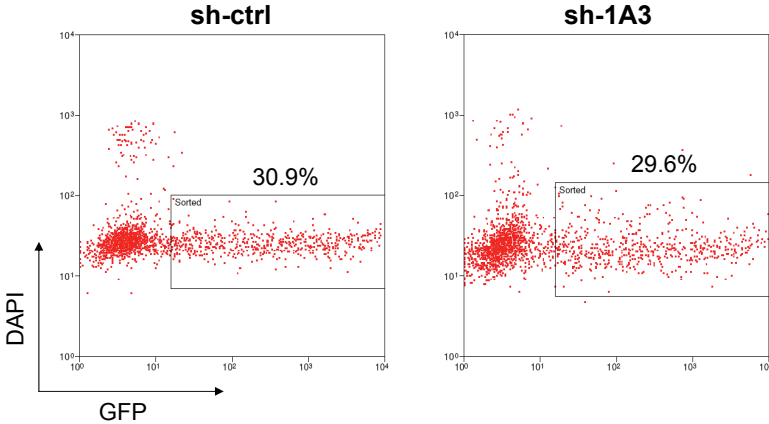

Figure S3

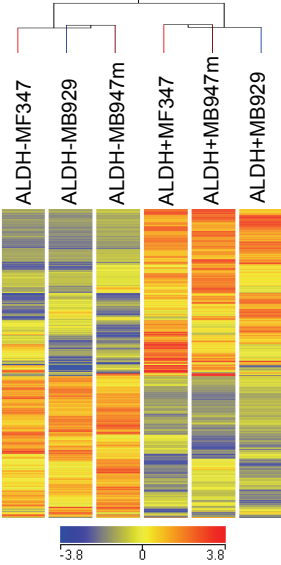

Figure S4

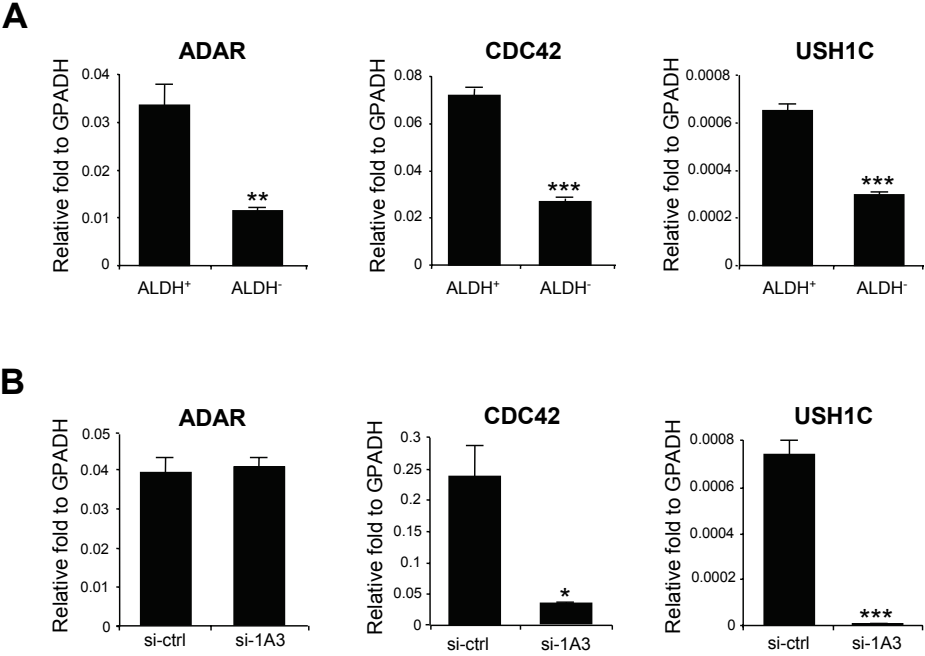

Supplement: NIHMS398934-supplement-Supp_Fig_S1-S4.pdf [file NIHMS398934-supplement-Supp_Fig_S1-S4.pdf]
